# Supplementary material for: Transcriptomic Changes in Young Japanese Males After Exposure to Acute Hypobaric Hypoxia
Source: PubMed Central journal article supplement (PMC7506118; doi:10.3389/fgene.2020.559074), 2020-09-08
Supplement: Data_Sheet_1.pdf [file Data_Sheet_1.pdf]

**Supplementary Table S1.** The 30 differentially expressed genes identified in this study.

| <b>Gene symbol</b> | <b>Full gene name</b>                            | <b>Reference<sup>a</sup></b>                                       |
|--------------------|--------------------------------------------------|--------------------------------------------------------------------|
| <i>AC005083.1</i>  | AC005083.1                                       |                                                                    |
| <i>ANKRD37</i>     | ankyrin repeat domain 37                         | Benita et al., 2009;<br>Klomp et al., 2020                         |
| <i>AQP3</i>        | aquaporin 3 (Gill blood group)                   | Zieseniss et al., 2016                                             |
| <i>ATG9B</i>       | autophagy related 9B                             | Robb et al., 2004;<br>Kalinowski et al., 2016                      |
| <i>ATP6VIC2</i>    | ATPase H <sup>+</sup> transporting V1 subunit C2 | McConnell et al., 2017                                             |
| <i>CD24</i>        | CD24 molecule                                    | Fujikuni et al., 2014                                              |
| <i>CD177</i>       | CD177 molecule                                   |                                                                    |
| <i>CLCA4</i>       | chloride channel accessory 4                     | Ganaie et al., 2019                                                |
| <i>CPA4</i>        | carboxypeptidase A4                              |                                                                    |
| <i>CRCT1</i>       | cysteine rich C-terminal 1                       |                                                                    |
| <i>DMKN</i>        | dermokine                                        | Huang et al., 2017                                                 |
| <i>ERO1A</i>       | endoplasmic reticulum oxidoreductase 1 alpha     | Takei et al., 2017                                                 |
| <i>FAM83A</i>      | family with sequence similarity 83 member A      |                                                                    |
| <i>GDF15</i>       | growth differentiation factor 15                 | Song et al., 2012; Haase, 2013;<br>Gassmann and Muckenthaler, 2015 |
| <i>GRPEL2</i>      | GrpE like 2, mitochondrial                       |                                                                    |
| <i>H1F0</i>        | H1 histone family member 0                       |                                                                    |
| <i>HEPHL1</i>      | hephaestin like 1                                | Long et al., 2015                                                  |
| <i>KLK6</i>        | kallikrein related peptidase 6                   | Yoon et al., 2007                                                  |
| <i>KLK12</i>       | kallikrein related peptidase 12                  | Kryza et al., 2014                                                 |
| <i>KLK13</i>       | kallikrein related peptidase 13                  |                                                                    |
| <i>LINC02487</i>   | long intergenic non-protein coding RNA 2487      |                                                                    |
| <i>LYPD3</i>       | LY6/PLAUR domain containing 3                    | Ngora et al., 2012                                                 |
| <i>PKP1</i>        | plakophilin 1                                    |                                                                    |
| <i>PPP1R3C</i>     | protein phosphatase 1 regulatory subunit 3C      | Shen et al., 2010                                                  |
| <i>S100A7</i>      | S100 calcium binding protein A7                  | Vegfors et al., 2016                                               |
| <i>S100A14</i>     | S100 calcium binding protein A14                 |                                                                    |
| <i>SBSN</i>        | suprabasin                                       | Goyal and Longo, 2014                                              |
| <i>SERPINB3</i>    | serpin family B member 3                         | Cannito et al., 2015                                               |
| <i>TMPRSS11A</i>   | transmembrane serine protease 11A                |                                                                    |
| <i>TMPRSS11E</i>   | transmembrane serine protease 11E                |                                                                    |

<sup>a</sup> The gene expression levels appeared to be affected by the hypoxic environment or by hypoxia-inducible factors in previous studies described below.

## References

- Benita, Y., Kikuchi, H., Smith, A. D., Zhang, M. Q., Chung, D. C., and Xavier, R. J. (2009). An integrative genomics approach identifies Hypoxia Inducible Factor-1 (HIF-1)-target genes that form the core response to hypoxia. *Nucleic Acids Res.* 37, 4587–4602. doi:10.1093/nar/gkp425.
- Cannito, S., Turato, C., Paternostro, C., Biasiolo, A., Colombatto, S., Cambieri, I., et al. (2015). Hypoxia up-regulates SERPINB3 through HIF-2 $\alpha$  in human liver cancer cells. *Oncotarget* 6, 2206–2221. doi:10.18632/oncotarget.2943.
- Fujikuni, N., Yamamoto, H., Tanabe, K., Naito, Y., Sakamoto, N., Tanaka, Y., et al. (2014). Hypoxia-mediated CD24 expression is correlated with gastric cancer aggressiveness by promoting cell migration and invasion. *Cancer Sci.* 105, 1411–1420. doi:10.1111/cas.12522.
- Ganaie, A. A., Parray, A., Hussain, T., Shabaneh, A., Jamroze, A., Ferrari, M. G., et al. (2019). Characterization of novel murine and human PDAC cell models: Identifying the role of intestine specific homeobox gene *ISX* in hypoxia and disease progression. *Transl. Oncol.* 12, 1056–1071. doi:10.1016/j.tranon.2019.05.002.
- Gassmann, M., and Muckenthaler, M. U. (2015). Adaptation of iron requirement to hypoxic conditions at high altitude. *J. Appl. Physiol.* 119, 1432–1440. doi:10.1152/jappphysiol.00248.2015.
- Goyal, R., and Longo, L. D. (2014). Acclimatization to long-term hypoxia: gene expression in ovine carotid arteries. *Physiol. Genomics* 46, 725–734. doi:10.1152/physiolgenomics.00073.2014.
- Haase, V. H. (2013). Regulation of erythropoiesis by hypoxia-inducible factors. *Blood Rev.* 27, 41–53. doi:10.1016/j.blre.2012.12.003.
- Huang, C., Xiang, Y., Chen, S., Yu, H., Wen, Z., Ye, T., et al. (2017). Dermokine contributes to epithelial–mesenchymal transition through increased activation of signal transducer and activator of transcription 3 in pancreatic cancer. *Cancer Sci.* 108, 2130–2141. doi:10.1111/cas.13347.
- Kalinowski, L., Janaszak-Jasiecka, A., Siekierzycka, A., Bartoszewska, S., Woźniak, M., Lejnowski, D., et al. (2016). Posttranscriptional and transcriptional regulation of endothelial nitric-oxide synthase during hypoxia: the role of microRNAs. *Cell. Mol. Biol. Lett.* 21, 16. doi:10.1186/s11658-016-0017-x.
- Klomp, J., Hyun, J., Klomp, J., Pajcini, K., Rehman, J., and Malik, A. B. (2020). Comprehensive transcriptomic profiling reveals SOX7 as an early regulator of angiogenesis in hypoxic human endothelial cells. *J. Biol. Chem.*, jbc.RA119.011822. doi:10.1074/jbc.RA119.011822.
- Kryza, T., Achard, C., Parent, C., Marchand-Adam, S., Guillon-Munos, A., Iochmann, S., et al. (2014). Angiogenesis stimulated by human kallikrein-related peptidase 12 acting *via* a platelet-derived growth factor B-dependent paracrine pathway. *FASEB J.* 28, 740–751. doi:10.1096/fj.13-237503.
- Long, Y., Yan, J., Song, G., Li, X., Li, X., Li, Q., et al. (2015). Transcriptional events co-regulated by hypoxia and cold stresses in Zebrafish larvae. *BMC Genomics* 16, 385. doi:10.1186/s12864-

015-1560-y.

- McConnell, M., Feng, S., Chen, W., Zhu, G., Shen, D., Ponnazhagan, S., et al. (2017). Osteoclast proton pump regulator *Atp6v1c1* enhances breast cancer growth by activating the mTORC1 pathway and bone metastasis by increasing V-ATPase activity. *Oncotarget* 8, 47675–47690. doi:10.18632/oncotarget.17544.
- Ngora, H., Galli, U. M., Miyazaki, K., and Zöller, M. (2012). Membrane-bound and exosomal metastasis-associated C4.4A promotes migration by associating with the  $\alpha_6\beta_4$  integrin and MT1-MMP<sup>1,2</sup>. *Neoplasia* 14, 95–107. doi:10.1593/neo.111450.
- Robb, G. B., Carson, A. R., Tai, S. C., Fish, J. E., Singh, S., Yamada, T., et al. (2004). Post-transcriptional regulation of endothelial nitric-oxide synthase by an overlapping antisense mRNA transcript. *J. Biol. Chem.* 279, 37982–37996. doi:10.1074/jbc.M400271200.
- Shen, G.-M., Zhang, F.-L., Liu, X.-L., and Zhang, J.-W. (2010). Hypoxia-inducible factor 1-mediated regulation of PPP1R3C promotes glycogen accumulation in human MCF-7 cells under hypoxia. *FEBS Lett.* 584, 4366–4372. doi:10.1016/j.febslet.2010.09.040.
- Song, H., Yin, D., and Liu, Z. (2012). GDF-15 promotes angiogenesis through modulating p53/HIF-1 $\alpha$  signaling pathway in hypoxic human umbilical vein endothelial cells. *Mol. Biol. Rep.* 39, 4017–4022. doi:10.1007/s11033-011-1182-7.
- Takei, N., Yoneda, A., Sakai-Sawada, K., Kosaka, M., Minomi, K., and Tamura, Y. (2017). Hypoxia-inducible ERO1 $\alpha$  promotes cancer progression through modulation of integrin- $\beta$ 1 modification and signalling in HCT116 colorectal cancer cells. *Sci. Rep.* 7, 1–11. doi:10.1038/s41598-017-09976-7.
- Vegfors, J., Ekman, A.-K., Stoll, S. W., Bivik Eding, C., and Enerbäck, C. (2016). Psoriasin (S100A7) promotes stress-induced angiogenesis. *Br. J. Dermatol.* 175, 1263–1273. doi:10.1111/bjd.14718.
- Yoon, H., Laxmikanthan, G., Lee, J., Blaber, S. I., Rodriguez, A., Kogot, J. M., et al. (2007). Activation profiles and regulatory cascades of the human kallikrein-related peptidases. *J. Biol. Chem.* 282, 31852–31864. doi:10.1074/jbc.M705190200.
- Zieseniss, A., Hoogewijs, D., Vogler, M., Zwenger, E., and Krull, S. (2016). Oxygen-dependent regulation of aquaporin-3 expression. *Hypoxia* 4, 91–97. doi:10.2147/hp.s97681.

**Supplementary Table S2.** The 48 DEGs (FDR < 0.05, |LFC| ≥ 1) identified by the edgeR program.

| <b>Gene symbol</b>             | <b>LFC</b> | <b>p value</b>         | <b>FDR</b>            |
|--------------------------------|------------|------------------------|-----------------------|
| <i>TMEM189-UBE2V1</i>          | 9.32       | 2.39×10 <sup>-12</sup> | 2.87×10 <sup>-8</sup> |
| <i>ERO1A</i> <sup>a</sup>      | 1.60       | 3.78×10 <sup>-8</sup>  | 2.27×10 <sup>-4</sup> |
| <i>CLCA4</i> <sup>a</sup>      | 1.35       | 3.34×10 <sup>-7</sup>  | 0.001                 |
| <i>KLK13</i> <sup>a</sup>      | 1.31       | 3.38×10 <sup>-7</sup>  | 0.001                 |
| <i>PLA2G4D</i>                 | 4.00       | 2.87×10 <sup>-7</sup>  | 0.001                 |
| <i>ATP6V1C2</i> <sup>a</sup>   | 1.85       | 5.09×10 <sup>-7</sup>  | 0.001                 |
| <i>AC008878.3</i>              | -8.48      | 5.63×10 <sup>-7</sup>  | 0.001                 |
| <i>DMKN</i> <sup>a</sup>       | 1.50       | 1.85×10 <sup>-6</sup>  | 0.003                 |
| <i>CD24</i> <sup>a</sup>       | 1.22       | 3.24×10 <sup>-6</sup>  | 0.004                 |
| <i>TMPRSS11E</i> <sup>a</sup>  | 1.16       | 4.19×10 <sup>-6</sup>  | 0.005                 |
| <i>SERPINA3</i>                | 1.75       | 4.02×10 <sup>-6</sup>  | 0.005                 |
| <i>TMPRSS11A</i> <sup>a</sup>  | 1.45       | 4.72×10 <sup>-6</sup>  | 0.005                 |
| <i>SERPIN3</i> <sup>a</sup>    | 1.40       | 5.61×10 <sup>-6</sup>  | 0.005                 |
| <i>GDF15</i> <sup>a</sup>      | 1.26       | 6.47×10 <sup>-6</sup>  | 0.006                 |
| <i>AC011462.1</i>              | 1.83       | 9.60×10 <sup>-6</sup>  | 0.008                 |
| <i>PPP1R3C</i> <sup>a</sup>    | 1.44       | 1.17×10 <sup>-5</sup>  | 0.009                 |
| <i>DENND2C</i>                 | 1.71       | 1.28×10 <sup>-5</sup>  | 0.009                 |
| <i>FAM83A</i> <sup>a</sup>     | 1.31       | 1.64×10 <sup>-5</sup>  | 0.011                 |
| <i>AC005083.1</i> <sup>a</sup> | 1.59       | 1.97×10 <sup>-5</sup>  | 0.012                 |
| <i>RASA4B</i>                  | 2.28       | 2.55×10 <sup>-5</sup>  | 0.015                 |
| <i>AC007325.4</i>              | -8.04      | 2.68×10 <sup>-5</sup>  | 0.015                 |
| <i>AQP3</i> <sup>a</sup>       | 1.28       | 3.01×10 <sup>-5</sup>  | 0.016                 |
| <i>HEPHE1</i> <sup>a</sup>     | 1.35       | 3.03×10 <sup>-5</sup>  | 0.016                 |
| <i>CPA4</i> <sup>a</sup>       | 1.16       | 3.57×10 <sup>-5</sup>  | 0.018                 |
| <i>ACP7</i>                    | 2.85       | 4.20×10 <sup>-5</sup>  | 0.019                 |
| <i>KANK3</i>                   | 7.90       | 4.21×10 <sup>-5</sup>  | 0.019                 |
| <i>IGHG1</i>                   | -1.83      | 4.64×10 <sup>-5</sup>  | 0.021                 |
| <i>ADRA2B</i>                  | -7.88      | 5.59×10 <sup>-5</sup>  | 0.024                 |
| <i>HSPH1</i>                   | 1.41       | 5.96×10 <sup>-5</sup>  | 0.025                 |
| <i>MT-ATP8</i>                 | 1.22       | 6.55×10 <sup>-5</sup>  | 0.026                 |
| <i>TMEM184A</i>                | 1.42       | 7.72×10 <sup>-5</sup>  | 0.030                 |
| <i>CYC1</i>                    | -1.68      | 8.11×10 <sup>-5</sup>  | 0.030                 |
| <i>KLK6</i> <sup>a</sup>       | 1.53       | 9.62×10 <sup>-5</sup>  | 0.035                 |
| <i>LINC02487</i> <sup>a</sup>  | 1.30       | 1.01×10 <sup>-4</sup>  | 0.036                 |
| <i>GABRE</i>                   | 1.33       | 1.31×10 <sup>-4</sup>  | 0.044                 |
| <i>SPINK7</i>                  | 1.03       | 1.33×10 <sup>-4</sup>  | 0.044                 |
| <i>CRCT1</i> <sup>a</sup>      | 1.11       | 1.39×10 <sup>-4</sup>  | 0.044                 |
| <i>HHIPL1</i>                  | 2.08       | 1.41×10 <sup>-4</sup>  | 0.044                 |
| <i>CCL3</i>                    | -1.09      | 1.45×10 <sup>-4</sup>  | 0.045                 |
| <i>AC011479.1</i>              | -7.56      | 1.54×10 <sup>-4</sup>  | 0.045                 |
| <i>FAM43A</i>                  | 1.42       | 1.60×10 <sup>-4</sup>  | 0.045                 |
| <i>ALDH1A3</i>                 | 1.03       | 1.62×10 <sup>-4</sup>  | 0.045                 |
| <i>PROB1</i>                   | -7.53      | 1.62×10 <sup>-4</sup>  | 0.045                 |

|                   |       |                       |       |
|-------------------|-------|-----------------------|-------|
| <i>CCL2</i>       | -1.34 | 1.64×10 <sup>-4</sup> | 0.045 |
| <i>APBB3</i>      | 1.04  | 1.76×10 <sup>-4</sup> | 0.047 |
| <i>IL6</i>        | -2.04 | 1.81×10 <sup>-4</sup> | 0.047 |
| <i>AC104452.1</i> | -7.50 | 1.85×10 <sup>-4</sup> | 0.047 |
| <i>CPLX1</i>      | -7.49 | 1.93×10 <sup>-4</sup> | 0.048 |

---

DEG, differentially expressed gene. FDR, false discovery rate. LFC, Log2 fold change.

<sup>a</sup> The DEG was also identified by the DESeq2 program.

**Supplementary Table S3.** GO processes estimated by topGO gene enrichment analysis using the 30 DEGs identified in this study.

| <b>GO ID</b> | <b>FDR</b> | <b>Description</b>                                                           |
|--------------|------------|------------------------------------------------------------------------------|
| GO:0097530   | 0.0004     | granulocyte migration                                                        |
| GO:0097529   | 0.0013     | myeloid leukocyte migration                                                  |
| GO:0002548   | 0.0020     | monocyte chemotaxis                                                          |
| GO:0071674   | 0.0034     | mononuclear cell migration                                                   |
| GO:0051604   | 0.0043     | protein maturation                                                           |
| GO:0048584   | 0.0059     | positive regulation of response to stimulus                                  |
| GO:0000041   | 0.0063     | transition metal ion transport                                               |
| GO:1990266   | 0.0072     | neutrophil migration                                                         |
| GO:0055074   | 0.0080     | calcium ion homeostasis                                                      |
| GO:0071621   | 0.0080     | granulocyte chemotaxis                                                       |
| GO:0072507   | 0.0103     | divalent inorganic cation homeostasis                                        |
| GO:0050900   | 0.0107     | leukocyte migration                                                          |
| GO:1902563   | 0.0133     | regulation of neutrophil activation                                          |
| GO:0040015   | 0.0133     | negative regulation of multicellular organism growth                         |
| GO:2000696   | 0.0133     | regulation of epithelial cell differentiation involved in kidney development |
| GO:0016540   | 0.0133     | protein autoprocesing                                                        |
| GO:0072672   | 0.0133     | neutrophil extravasation                                                     |
| GO:0072160   | 0.0146     | nephron tubule epithelial cell differentiation                               |
| GO:0061318   | 0.0146     | renal filtration cell differentiation                                        |
| GO:0072112   | 0.0146     | glomerular visceral epithelial cell differentiation                          |
| GO:0072311   | 0.0146     | glomerular epithelial cell differentiation                                   |
| GO:0045217   | 0.0146     | cell-cell junction maintenance                                               |
| GO:2001044   | 0.0160     | regulation of integrin-mediated signaling pathway                            |
| GO:0072010   | 0.0173     | glomerular epithelium development                                            |
| GO:0019471   | 0.0173     | 4-hydroxyproline metabolic process                                           |
| GO:0002021   | 0.0173     | response to dietary excess                                                   |
| GO:0036149   | 0.0173     | phosphatidylinositol acyl-chain remodeling                                   |
| GO:0034331   | 0.0173     | cell junction maintenance                                                    |
| GO:0043410   | 0.0184     | positive regulation of MAPK cascade                                          |
| GO:1901741   | 0.0186     | positive regulation of myoblast fusion                                       |
| GO:0042755   | 0.0186     | eating behavior                                                              |
| GO:0032930   | 0.0186     | positive regulation of superoxide anion generation                           |
| GO:0036148   | 0.0186     | phosphatidylglycerol acyl-chain remodeling                                   |
| GO:0048245   | 0.0199     | eosinophil chemotaxis                                                        |
| GO:0034975   | 0.0199     | protein folding in endoplasmic reticulum                                     |
| GO:0006575   | 0.0210     | cellular modified amino acid metabolic process                               |
| GO:0090026   | 0.0212     | positive regulation of monocyte chemotaxis                                   |

|            |        |                                                                      |
|------------|--------|----------------------------------------------------------------------|
| GO:1901739 | 0.0212 | regulation of myoblast fusion                                        |
| GO:0060396 | 0.0212 | growth hormone receptor signaling pathway                            |
| GO:0071378 | 0.0212 | cellular response to growth hormone stimulus                         |
| GO:0009967 | 0.0216 | positive regulation of signal transduction                           |
| GO:0055065 | 0.0222 | metal ion homeostasis                                                |
| GO:0036150 | 0.0225 | phosphatidylserine acyl-chain remodeling                             |
| GO:0008219 | 0.0230 | cell death                                                           |
| GO:0072677 | 0.0239 | eosinophil migration                                                 |
| GO:0060143 | 0.0239 | positive regulation of syncytium formation by plasma membrane fusion |
| GO:0032928 | 0.0239 | regulation of superoxide anion generation                            |
| GO:0006825 | 0.0239 | copper ion transport                                                 |
| GO:0016485 | 0.0251 | protein processing                                                   |
| GO:0071677 | 0.0252 | positive regulation of mononuclear cell migration                    |
| GO:0043302 | 0.0252 | positive regulation of leukocyte degranulation                       |
| GO:0030595 | 0.0254 | leukocyte chemotaxis                                                 |
| GO:0060142 | 0.0265 | regulation of syncytium formation by plasma membrane fusion          |
| GO:0046475 | 0.0265 | glycerophospholipid catabolic process                                |
| GO:0090025 | 0.0265 | regulation of monocyte chemotaxis                                    |
| GO:0042104 | 0.0265 | positive regulation of activated T cell proliferation                |
| GO:0071709 | 0.0278 | membrane assembly                                                    |
| GO:0045745 | 0.0278 | positive regulation of G protein-coupled receptor signaling pathway  |
| GO:0071624 | 0.0291 | positive regulation of granulocyte chemotaxis                        |
| GO:0036152 | 0.0291 | phosphatidylethanolamine acyl-chain remodeling                       |
| GO:0055080 | 0.0293 | cation homeostasis                                                   |
| GO:0010647 | 0.0297 | positive regulation of cell communication                            |
| GO:0007204 | 0.0298 | positive regulation of cytosolic calcium ion concentration           |
| GO:0023056 | 0.0303 | positive regulation of signaling                                     |
| GO:0010831 | 0.0304 | positive regulation of myotube differentiation                       |
| GO:0036151 | 0.0304 | phosphatidylcholine acyl-chain remodeling                            |
| GO:0098771 | 0.0305 | inorganic ion homeostasis                                            |
| GO:0060416 | 0.0317 | response to growth hormone                                           |
| GO:0046471 | 0.0317 | phosphatidylglycerol metabolic process                               |
| GO:0090184 | 0.0330 | positive regulation of kidney development                            |
| GO:0042554 | 0.0330 | superoxide anion generation                                          |
| GO:0032594 | 0.0330 | protein transport within lipid bilayer                               |
| GO:0007169 | 0.0331 | transmembrane receptor protein tyrosine kinase signaling pathway     |
| GO:0043406 | 0.0337 | positive regulation of MAP kinase activity                           |
| GO:0007520 | 0.0343 | myoblast fusion                                                      |
| GO:0002888 | 0.0343 | positive regulation of myeloid leukocyte mediated immunity           |
| GO:0044091 | 0.0343 | membrane biogenesis                                                  |
| GO:0006658 | 0.0343 | phosphatidylserine metabolic process                                 |

|            |        |                                                                                 |
|------------|--------|---------------------------------------------------------------------------------|
| GO:0098660 | 0.0353 | inorganic ion transmembrane transport                                           |
| GO:0035850 | 0.0356 | epithelial cell differentiation involved in kidney development                  |
| GO:0051480 | 0.0360 | regulation of cytosolic calcium ion concentration                               |
| GO:0010862 | 0.0369 | positive regulation of pathway-restricted SMAD protein phosphorylation          |
| GO:0045730 | 0.0369 | respiratory burst                                                               |
| GO:0050801 | 0.0373 | ion homeostasis                                                                 |
| GO:0030001 | 0.0381 | metal ion transport                                                             |
| GO:0051085 | 0.0382 | chaperone cofactor-dependent protein refolding                                  |
| GO:0090322 | 0.0382 | regulation of superoxide metabolic process                                      |
| GO:0015991 | 0.0382 | ATP hydrolysis coupled proton transport                                         |
| GO:0071375 | 0.0387 | cellular response to peptide hormone stimulus                                   |
| GO:0071634 | 0.0395 | regulation of transforming growth factor beta production                        |
| GO:0030574 | 0.0395 | collagen catabolic process                                                      |
| GO:0034142 | 0.0408 | toll-like receptor 4 signaling pathway                                          |
| GO:0034220 | 0.0408 | ion transmembrane transport                                                     |
| GO:0009395 | 0.0408 | phospholipid catabolic process                                                  |
| GO:0043408 | 0.0409 | regulation of MAPK cascade                                                      |
| GO:0060326 | 0.0411 | cell chemotaxis                                                                 |
| GO:0001666 | 0.0414 | response to hypoxia                                                             |
| GO:0071604 | 0.0420 | transforming growth factor beta production                                      |
| GO:0050873 | 0.0420 | brown fat cell differentiation                                                  |
| GO:0061005 | 0.0420 | cell differentiation involved in kidney development                             |
| GO:0055085 | 0.0420 | transmembrane transport                                                         |
| GO:0046006 | 0.0433 | regulation of activated T cell proliferation                                    |
| GO:0033572 | 0.0433 | transferrin transport                                                           |
| GO:0015988 | 0.0433 | energy coupled proton transmembrane transport, against electrochemical gradient |
| GO:0036293 | 0.0445 | response to decreased oxygen levels                                             |
| GO:0071675 | 0.0446 | regulation of mononuclear cell migration                                        |
| GO:0051084 | 0.0446 | 'de novo' posttranslational protein folding                                     |
| GO:0090183 | 0.0446 | regulation of kidney development                                                |
| GO:0006654 | 0.0446 | phosphatidic acid biosynthetic process                                          |
| GO:0097193 | 0.0458 | intrinsic apoptotic signaling pathway                                           |
| GO:0000768 | 0.0459 | syncytium formation by plasma membrane fusion                                   |
| GO:0140253 | 0.0459 | cell-cell fusion                                                                |
| GO:1903307 | 0.0459 | positive regulation of regulated secretory pathway                              |
| GO:0015682 | 0.0459 | ferric iron transport                                                           |
| GO:0072512 | 0.0459 | trivalent inorganic cation transport                                            |
| GO:0046473 | 0.0459 | phosphatidic acid metabolic process                                             |
| GO:0006949 | 0.0472 | syncytium formation                                                             |
| GO:0071622 | 0.0472 | regulation of granulocyte chemotaxis                                            |
| GO:0060393 | 0.0485 | regulation of pathway-restricted SMAD protein phosphorylation                   |



|            |        |                                                         |
|------------|--------|---------------------------------------------------------|
| GO:0061098 | 0.0485 | positive regulation of protein tyrosine kinase activity |
| GO:0050798 | 0.0485 | activated T cell proliferation                          |
| GO:0032835 | 0.0485 | glomerulus development                                  |
| GO:0002696 | 0.0494 | positive regulation of leukocyte activation             |
| GO:0043300 | 0.0497 | regulation of leukocyte degranulation                   |
| GO:0006458 | 0.0497 | 'de novo' protein folding                               |

---

GO terms with an FDR of  $< 0.05$  and a minimum of 2 associated genes per GO term were defined as significantly overrepresented terms.

GO, gene ontology. DEG, differentially expressed gene. FDR, false discovery rate.

**Supplementary Table S4.** GO processes estimated by BiNGO gene enrichment analysis using the 30 DEGs identified in this study.

| GO ID      | <i>p</i> value        | FDR                   | Description                                                        |
|------------|-----------------------|-----------------------|--------------------------------------------------------------------|
| GO:0071624 | 1.86×10 <sup>-6</sup> | 7.78×10 <sup>-4</sup> | positive regulation of granulocyte chemotaxis                      |
| GO:0090025 | 1.11×10 <sup>-5</sup> | 0.002                 | regulation of monocyte chemotaxis                                  |
| GO:0090026 | 1.11×10 <sup>-5</sup> | 0.002                 | positive regulation of monocyte chemotaxis                         |
| GO:0071622 | 2.78×10 <sup>-5</sup> | 0.003                 | regulation of granulocyte chemotaxis                               |
| GO:0006508 | 3.59×10 <sup>-4</sup> | 0.028                 | proteolysis                                                        |
| GO:0002684 | 4.41×10 <sup>-4</sup> | 0.028                 | positive regulation of immune system process                       |
| GO:0002690 | 4.62×10 <sup>-4</sup> | 0.028                 | positive regulation of leukocyte chemotaxis                        |
| GO:0002688 | 6.87×10 <sup>-4</sup> | 0.029                 | regulation of leukocyte chemotaxis                                 |
| GO:0002237 | 6.98×10 <sup>-4</sup> | 0.029                 | response to molecule of bacterial origin                           |
| GO:0002687 | 8.43×10 <sup>-4</sup> | 0.029                 | positive regulation of leukocyte migration                         |
| GO:0030856 | 9.55×10 <sup>-4</sup> | 0.029                 | regulation of epithelial cell differentiation                      |
| GO:0032913 | 0.001                 | 0.029                 | negative regulation of transforming growth factor-beta3 production |
| GO:0033606 | 0.001                 | 0.029                 | chemokine receptor transport within lipid bilayer                  |
| GO:0032594 | 0.001                 | 0.029                 | protein transport within lipid bilayer                             |
| GO:0032595 | 0.001                 | 0.029                 | B cell receptor transport within lipid bilayer                     |
| GO:0032596 | 0.001                 | 0.029                 | protein transport into membrane raft                               |
| GO:0032597 | 0.001                 | 0.029                 | B cell receptor transport into membrane raft                       |
| GO:0032599 | 0.001                 | 0.029                 | protein transport out of membrane raft                             |
| GO:0032600 | 0.001                 | 0.029                 | chemokine receptor transport out of membrane raft                  |
| GO:0002685 | 0.001                 | 0.029                 | regulation of leukocyte migration                                  |
| GO:0050921 | 0.001                 | 0.029                 | positive regulation of chemotaxis                                  |
| GO:0048520 | 0.002                 | 0.037                 | positive regulation of behavior                                    |
| GO:0050920 | 0.002                 | 0.041                 | regulation of chemotaxis                                           |
| GO:0002682 | 0.003                 | 0.044                 | regulation of immune system process                                |
| GO:0071635 | 0.003                 | 0.047                 | negative regulation of transforming growth factor-beta production  |

GO, gene ontology. DEG, differentially expressed gene. FDR, false discovery rate.

**Supplementary Table S5.** GO processes estimated by ClueGO gene enrichment analysis using the 30 DEGs identified in this study.

| <b>GO ID</b> | <b><i>p</i> value</b> | <b>FDR</b> | <b>Description</b>                                |
|--------------|-----------------------|------------|---------------------------------------------------|
| GO:0071677   | $8.29 \times 10^{-4}$ | 0.002      | positive regulation of mononuclear cell migration |
| GO:0090025   | 0.001                 | 0.001      | regulation of monocyte chemotaxis                 |
| GO:0071624   | 0.001                 | 0.002      | positive regulation of granulocyte chemotaxis     |
| GO:0090026   | $4.95 \times 10^{-4}$ | 0.002      | positive regulation of monocyte chemotaxis        |

GO, gene ontology. DEG, differentially expressed gene. FDR, false discovery rate.

**Supplementary Table S6.** KEGG pathway estimated using the 30 DEGs identified in this study.

| <b>KEGG ID</b> | <b>Pathway</b>                                             | <b>Gene name<sup>a</sup></b> |
|----------------|------------------------------------------------------------|------------------------------|
| hsa00190       | Oxidative phosphorylation                                  | <i>ATP6V1C2</i>              |
| hsa01100       | Metabolic pathways                                         | <i>ATP6V1C2</i>              |
| hsa04060       | Cytokine-cytokine receptor interaction                     | <i>GDF15</i>                 |
| hsa04136       | Autophagy - other                                          | <i>ATG9B</i>                 |
| hsa04137       | Mitophagy - animal                                         | <i>ATG9B</i>                 |
| hsa04140       | Autophagy - animal                                         | <i>ATG9B</i>                 |
| hsa04141       | Protein processing in endoplasmic reticulum                | <i>ERO1A</i>                 |
| hsa04145       | Phagosome                                                  | <i>ATP6V1C2</i>              |
| hsa04150       | mTOR signaling pathway                                     | <i>ATP6V1C2</i>              |
| hsa04640       | Hematopoietic cell lineage                                 | <i>CD24</i>                  |
| hsa04657       | IL-17 signaling pathway                                    | <i>S100A7</i>                |
| hsa04721       | Synaptic vesicle cycle                                     | <i>ATP6V1C2</i>              |
| hsa04910       | Insulin signaling pathway                                  | <i>PPP1R3C</i>               |
| hsa04924       | Renin secretion                                            | <i>CLCA4</i>                 |
| hsa04931       | Insulin resistance                                         | <i>PPP1R3C</i>               |
| hsa04962       | Vasopressin-regulated water reabsorption                   | <i>AQP3</i>                  |
| hsa04966       | Collecting duct acid secretion                             | <i>ATP6V1C2</i>              |
| hsa04972       | Pancreatic secretion                                       | <i>CLCA4</i>                 |
| hsa05110       | Vibrio cholerae infection                                  | <i>ATP6V1C2, ERO1A</i>       |
| hsa05120       | Epithelial cell signaling in Helicobacter pylori infection | <i>ATP6V1C2</i>              |
| hsa05146       | Amoebiasis                                                 | <i>SERPINB3</i>              |
| hsa05165       | Human papillomavirus infection                             | <i>ATP6V1C2</i>              |
| hsa05323       | Rheumatoid arthritis                                       | <i>ATP6V1C2</i>              |

KEGG, Kyoto Encyclopedia of Genes and Genomes. DEG, differentially expressed gene.

<sup>a</sup> DEGs identified in this study mapped to the KEGG pathway.
