# Supplementary material for: Transcriptomic Changes in Young Japanese Males After Exposure to Acute Hypobaric Hypoxia
Source: PubMed Central journal article supplement (PMC7506118; doi:10.3389/fgene.2020.559074), 2020-09-08
Supplement: Presentation_1.pdf [file Presentation_1.pdf]

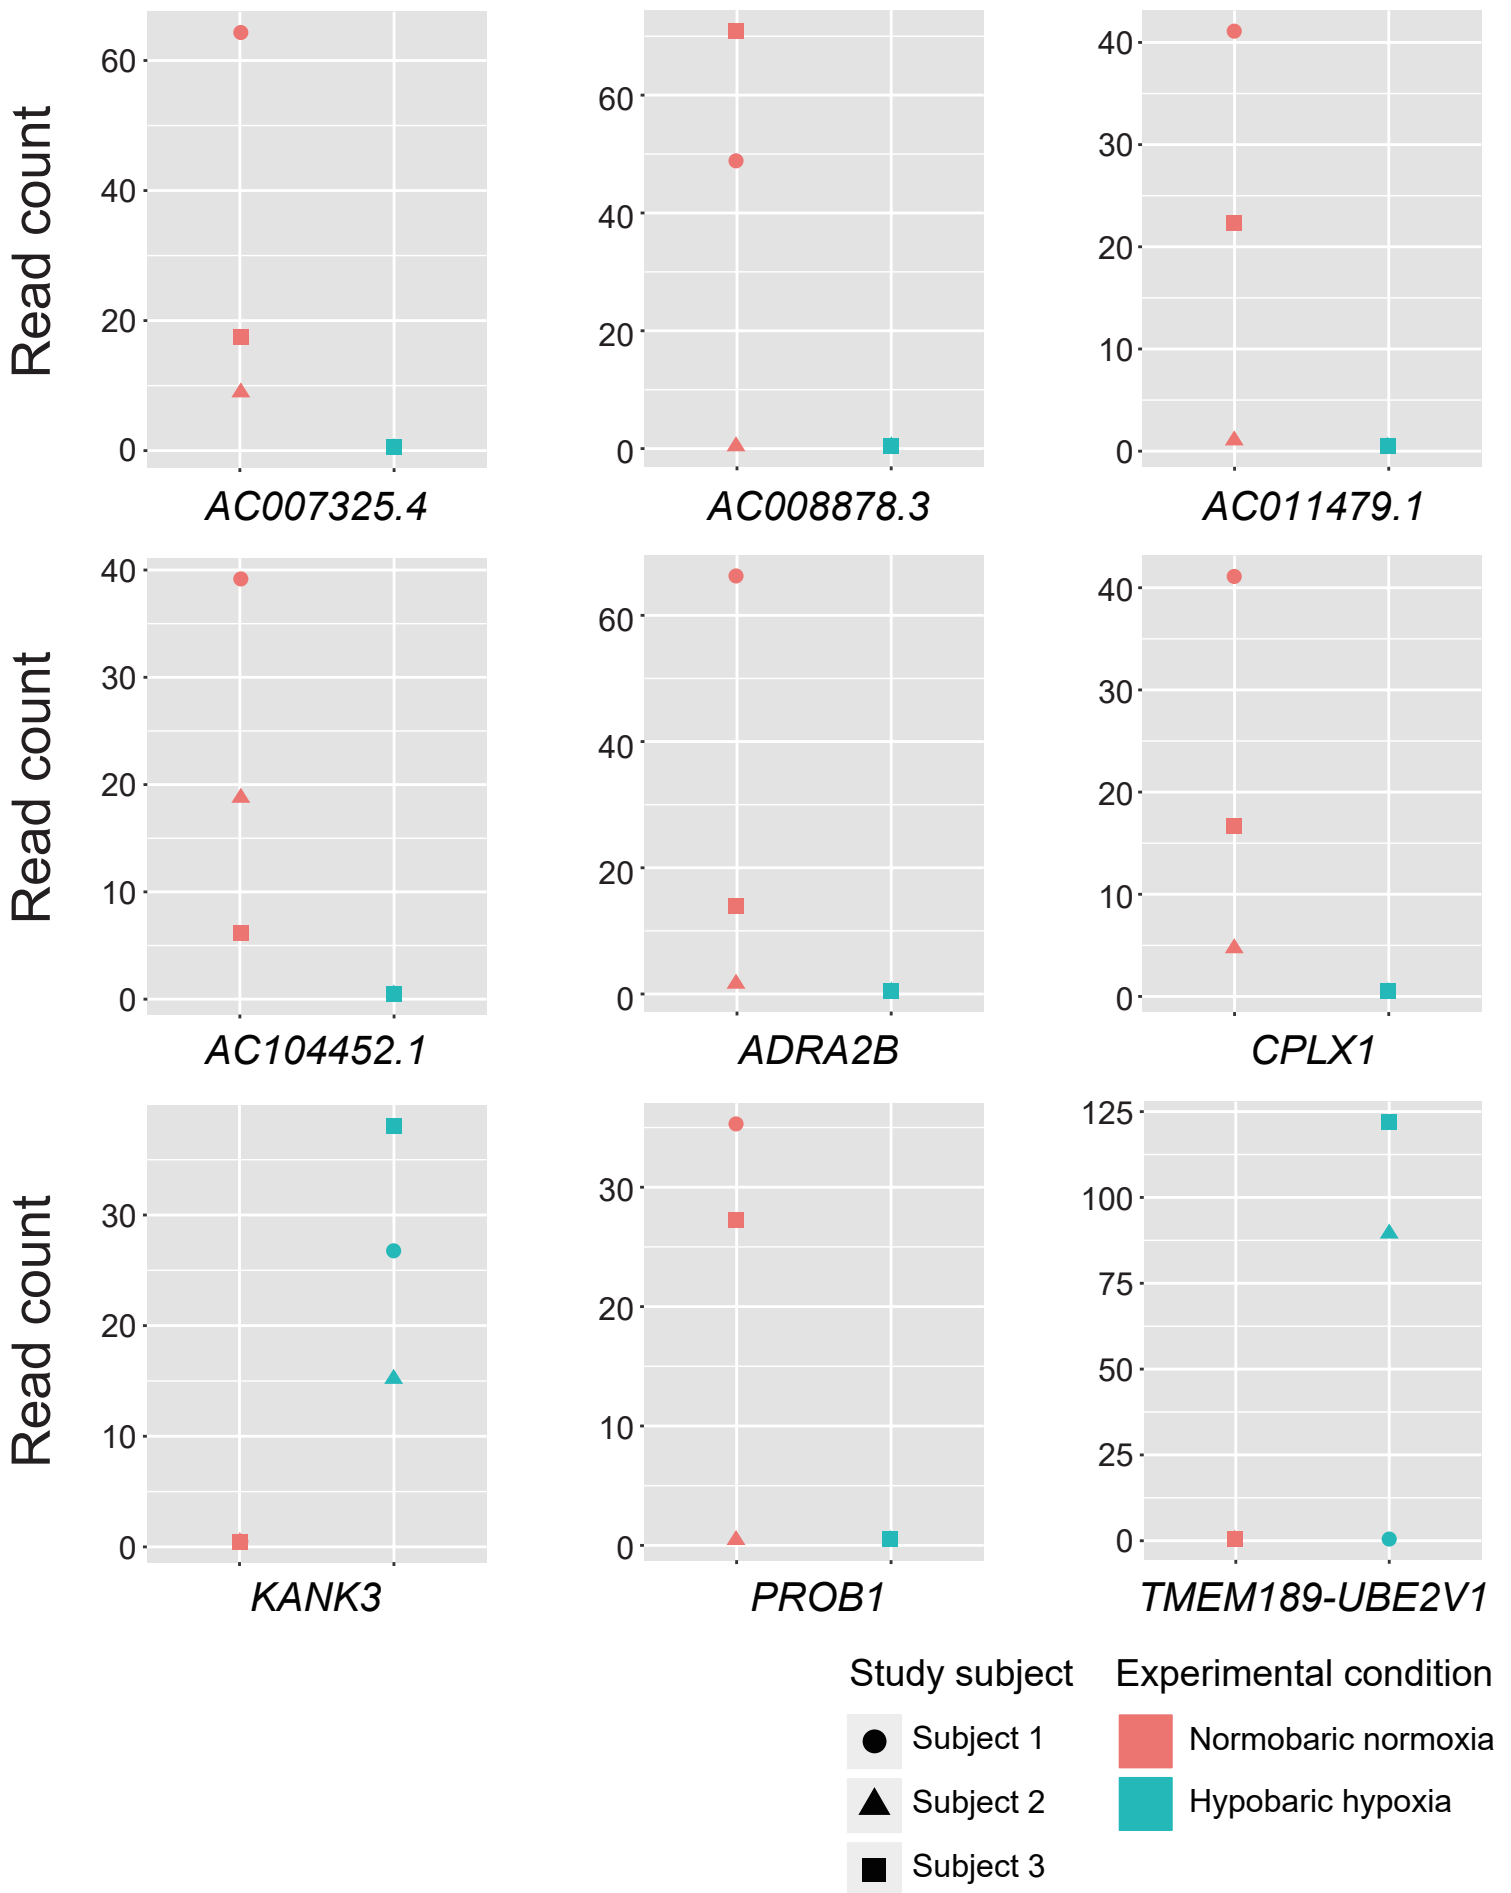

**Supplementary Figure S1.** Expression levels of the nine differentially expressed genes with  $|LFC|$  of  $> 7$ , identified by the edgeR program, in each of the study subjects. Read counts represent the estimated expression abundance at the gene level.

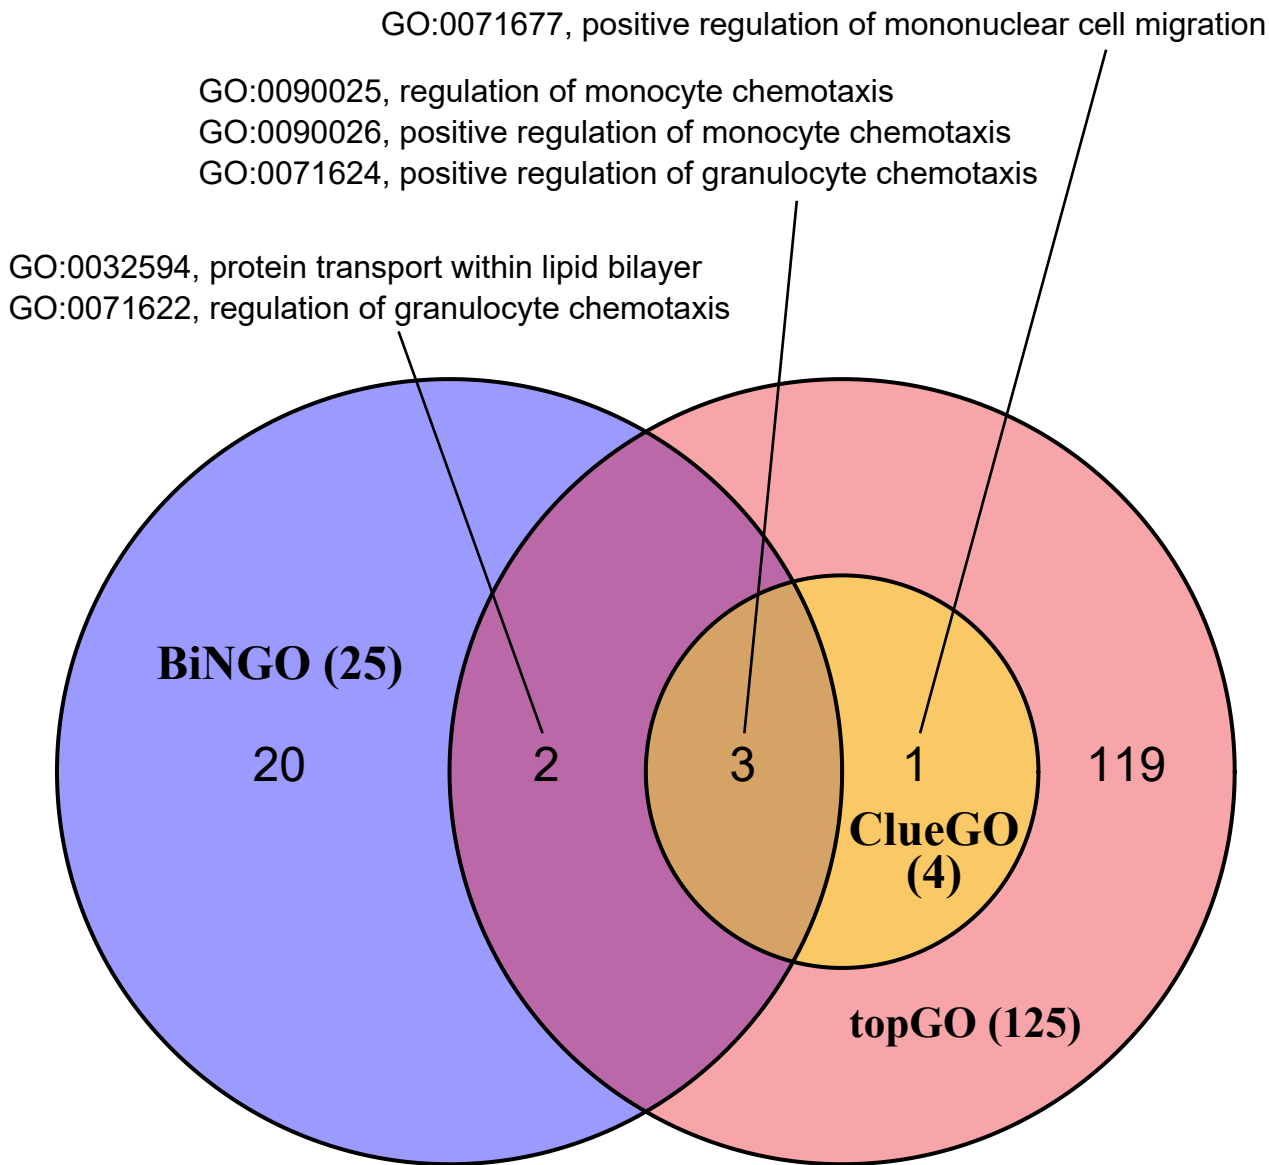

**Supplementary Figure S2.** Venn diagram of Gene Ontology terms estimated from 30 differentially expressed genes using three enrichment analysis methods.

GO:0008150, biological process

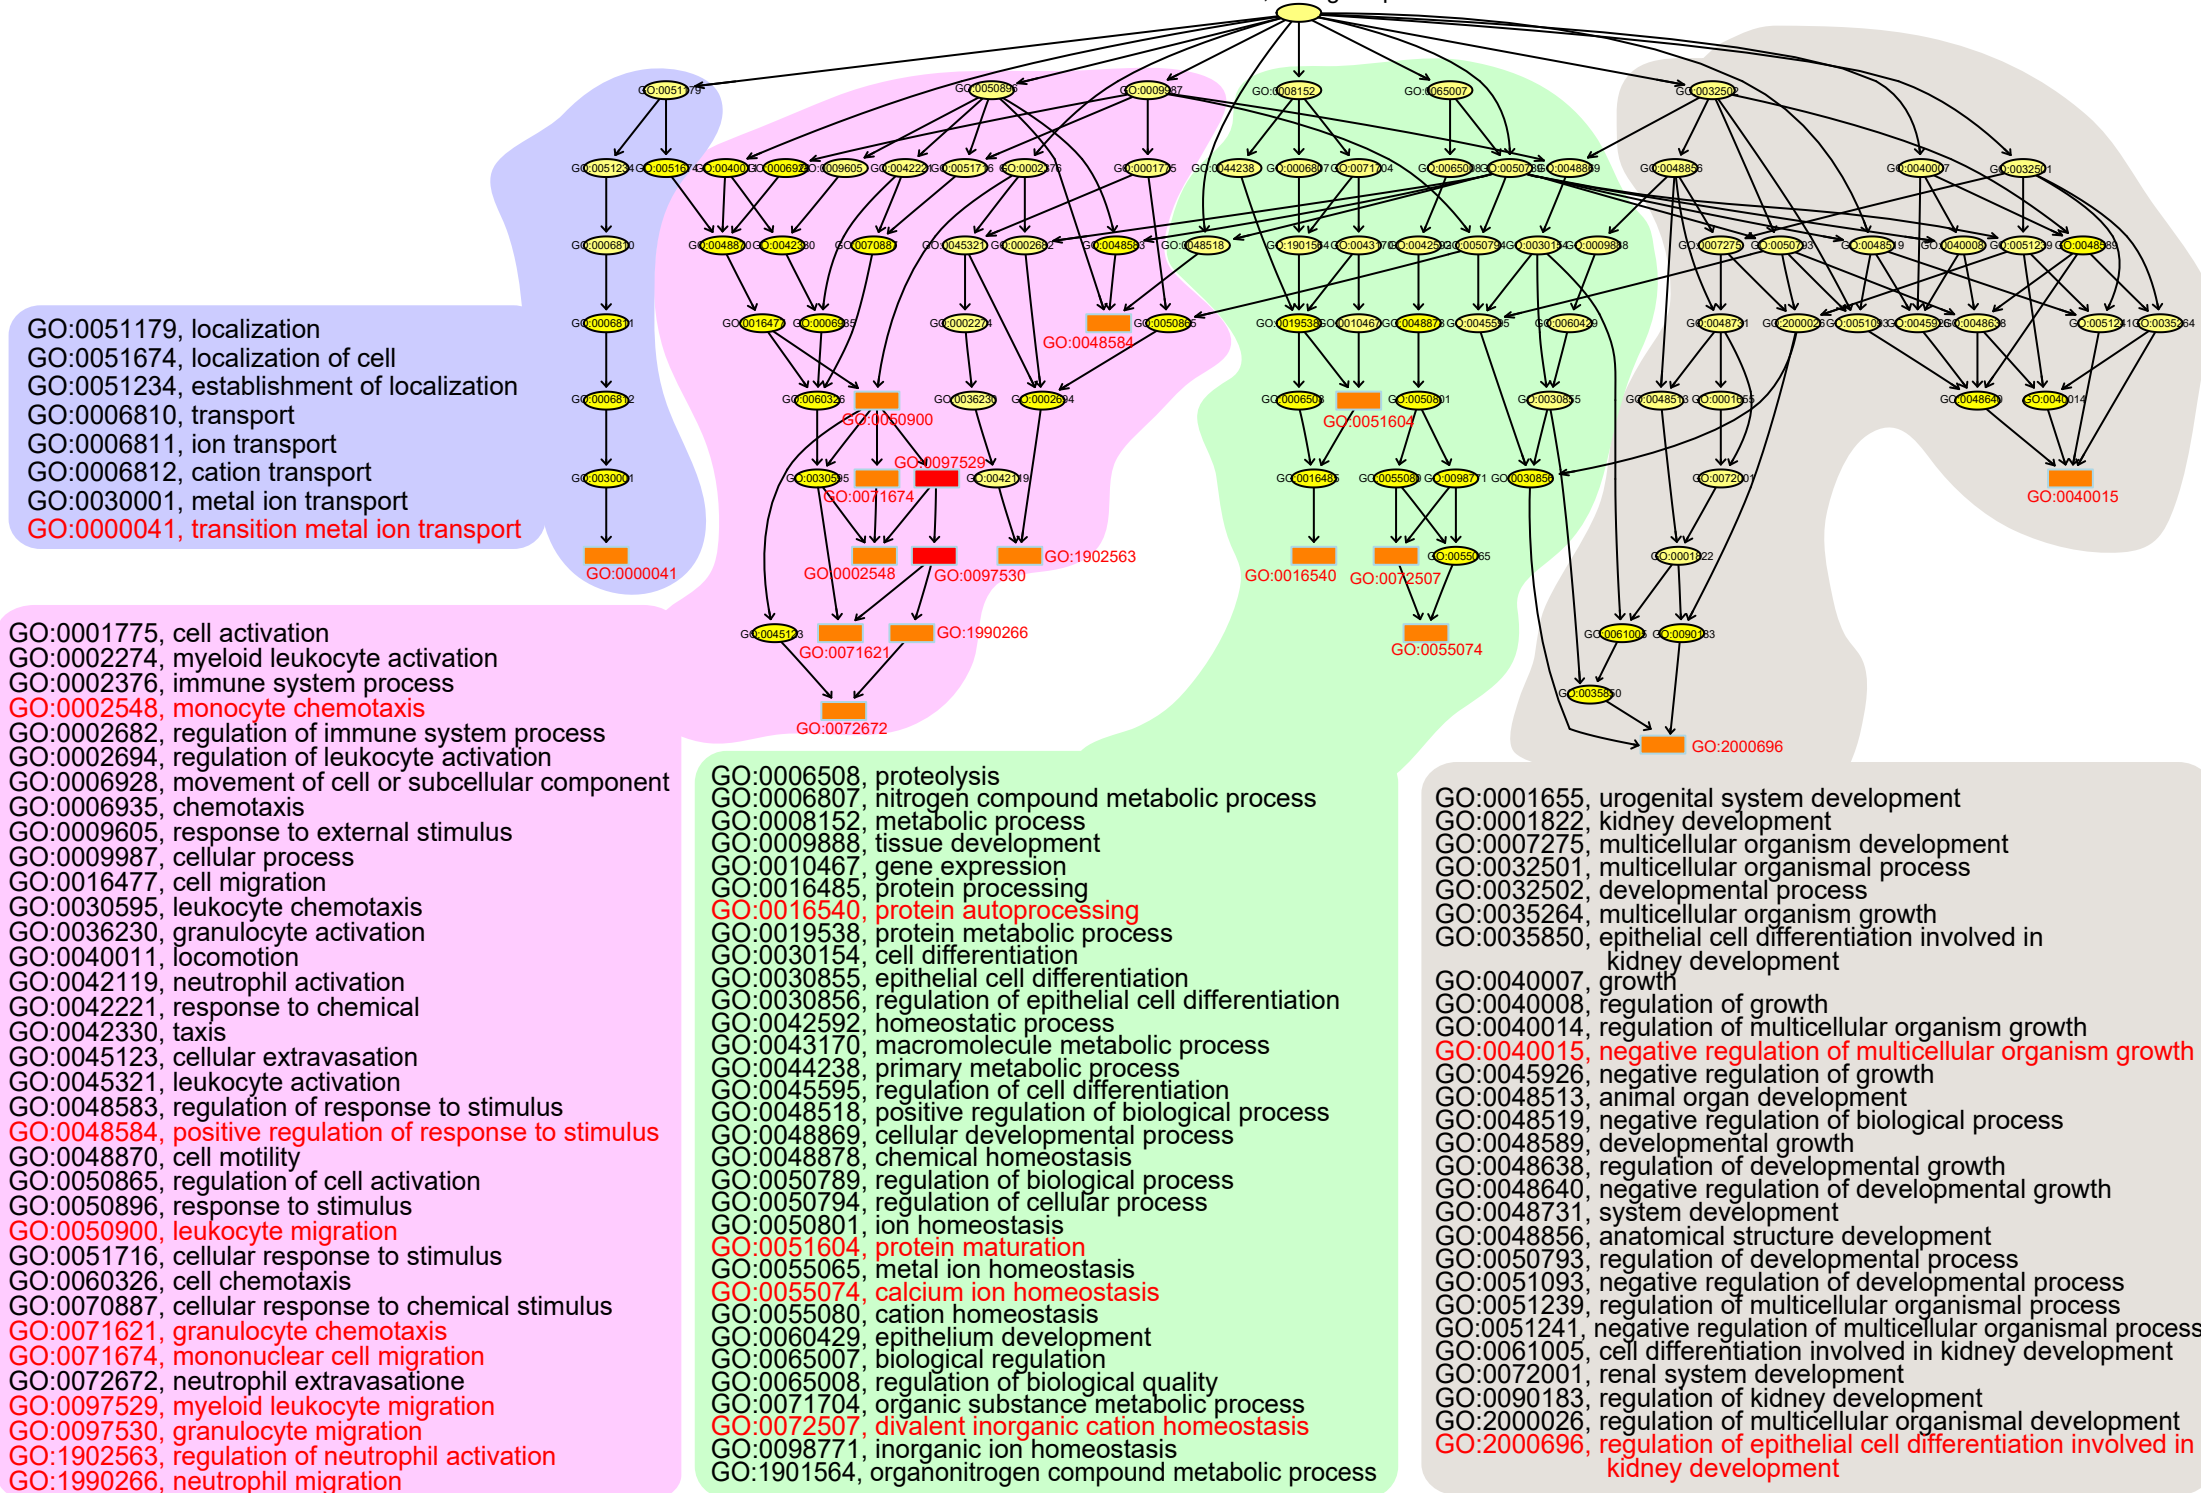

Supplementary Figure S3. Hierarchical tree of the overrepresented Gene Ontology terms (shown in red characters) estimated from 30 differentially expressed genes.
